# Supplementary material for: Assay establishment and validation of a high-throughput organoid-based drug screening platform
Source: PubMed Central journal article supplement (PMC9137096; doi:10.1186/s13287-022-02902-3), 2022-05-26
Supplement: 13287_2022_2902_MOESM1_ESM.pdf [file 13287_2022_2902_MOESM1_ESM.pdf]

Additional file 1 for

**Assay establishment and validation of a high-throughput organoid-based drug screening platform**

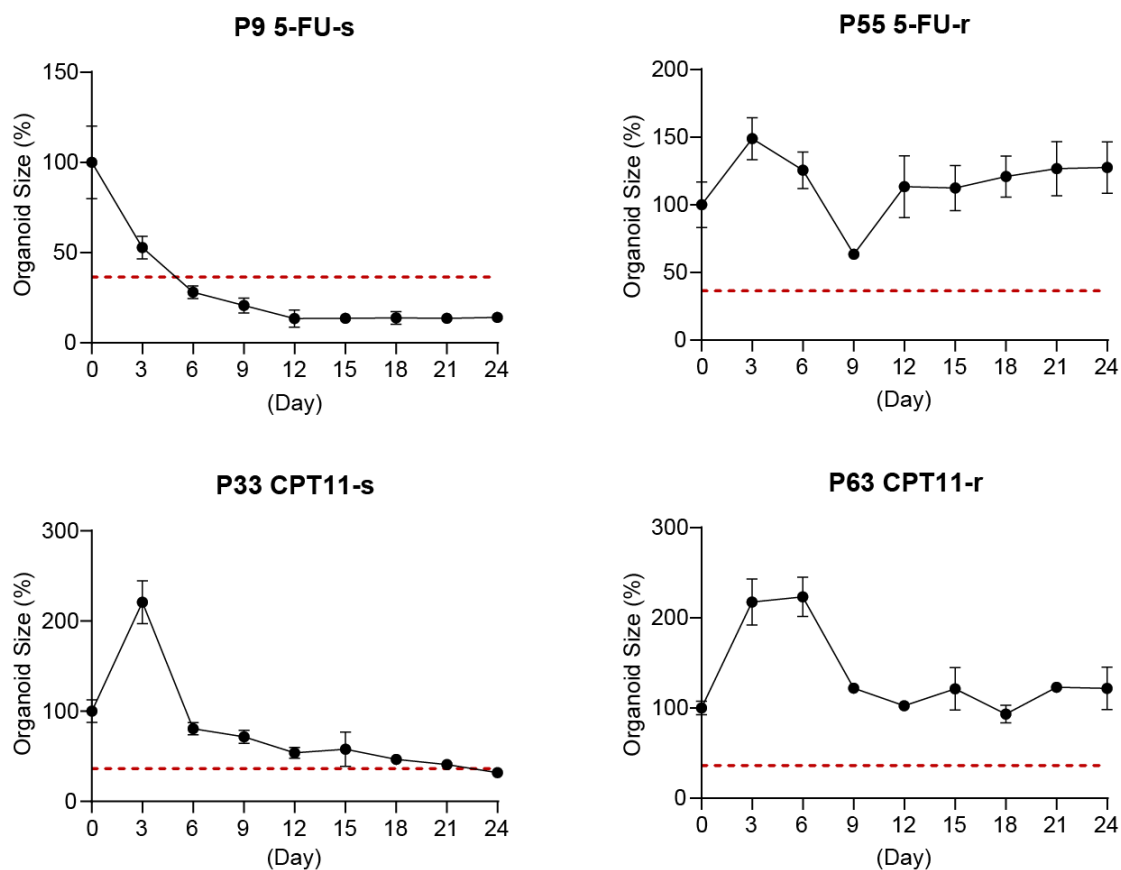

**Additional file 1: Fig. S1**

**The chemosensitivities of 4 tumor organoids used for validation of the high-throughput organoid imaging assay.** Organoid size changes after being treated by 10 $\mu$ M 5-FU or 10 $\mu$ M CPT11 in 4 organoid lines. 5-FU-s, 5-FU-r: Organoids defined as chemo sensitive or resistant to 5-Fluorouracil; CPT11-s, CPT11-r: Organoids defined as chemo sensitive or resistant to CPT11. Organoid size data shown are mean  $\pm$  SEM, n=3.

A

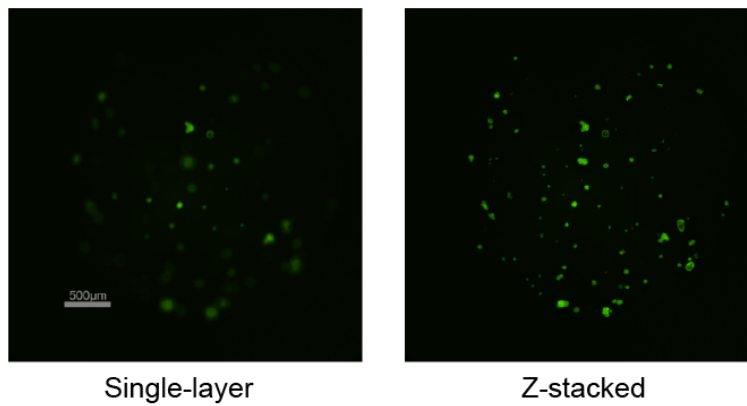

B

Comparison of the single-layer image and Z-stacked image

| Single layer |                    | Z-stacked |                    |
|--------------|--------------------|-----------|--------------------|
| Count        | Total Area (pixel) | Count     | Total Area (pixel) |
| 8            | 8787               | 40        | 22521              |

**Additional file 1: Fig. S2**

**The comparison of the single-layer and Z-stacked image.**

**A.** Representative single-layer image and Z-stacked image under the same field; **B.** Comparison of the single-layer and Z-stacked image (organoids that were blurred in the image were not measured).

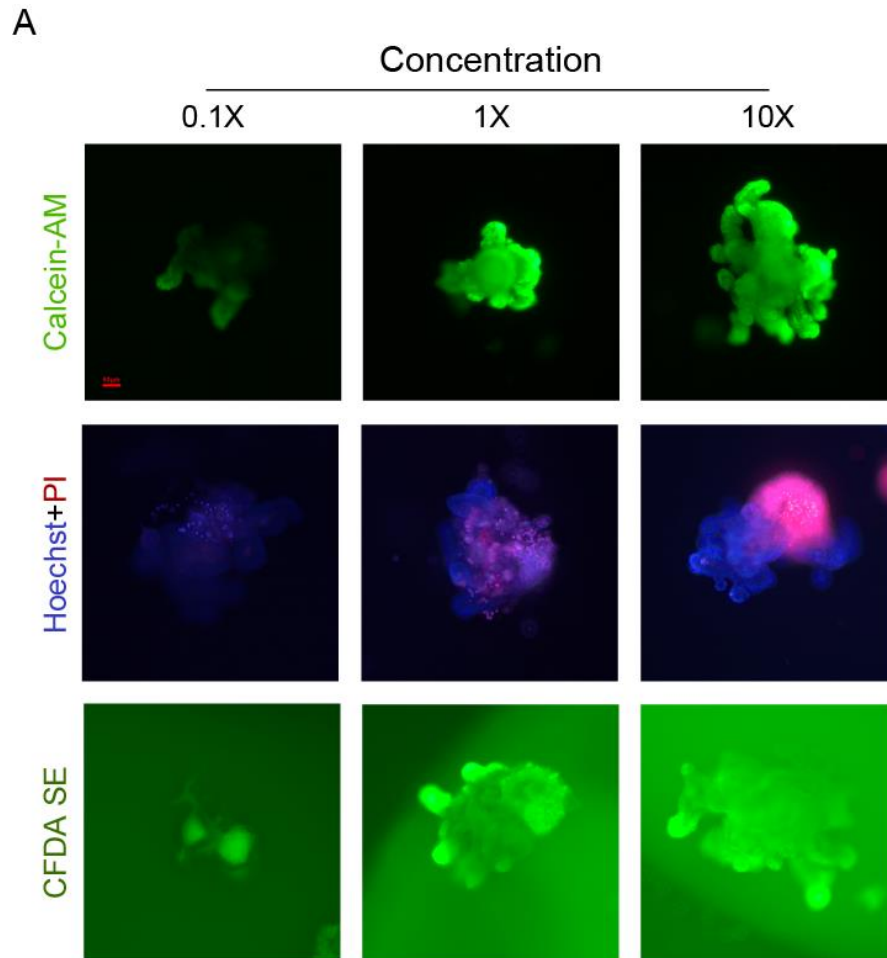

**Additional file 1: Fig. S3**

**The comparison of three staining methods under different concentrations.**

**A**, Calcein-AM, Hoechst/PI, and CFDA SE of different concentrations were used to stain mice small intestinal organoids. For Calcein-AM dye, “1X” concentration means 2 $\mu$ M, and for Hoechst/PI and CFDA SE staining, “1X” concentration means the recommended working concentration according to the manufacturers.

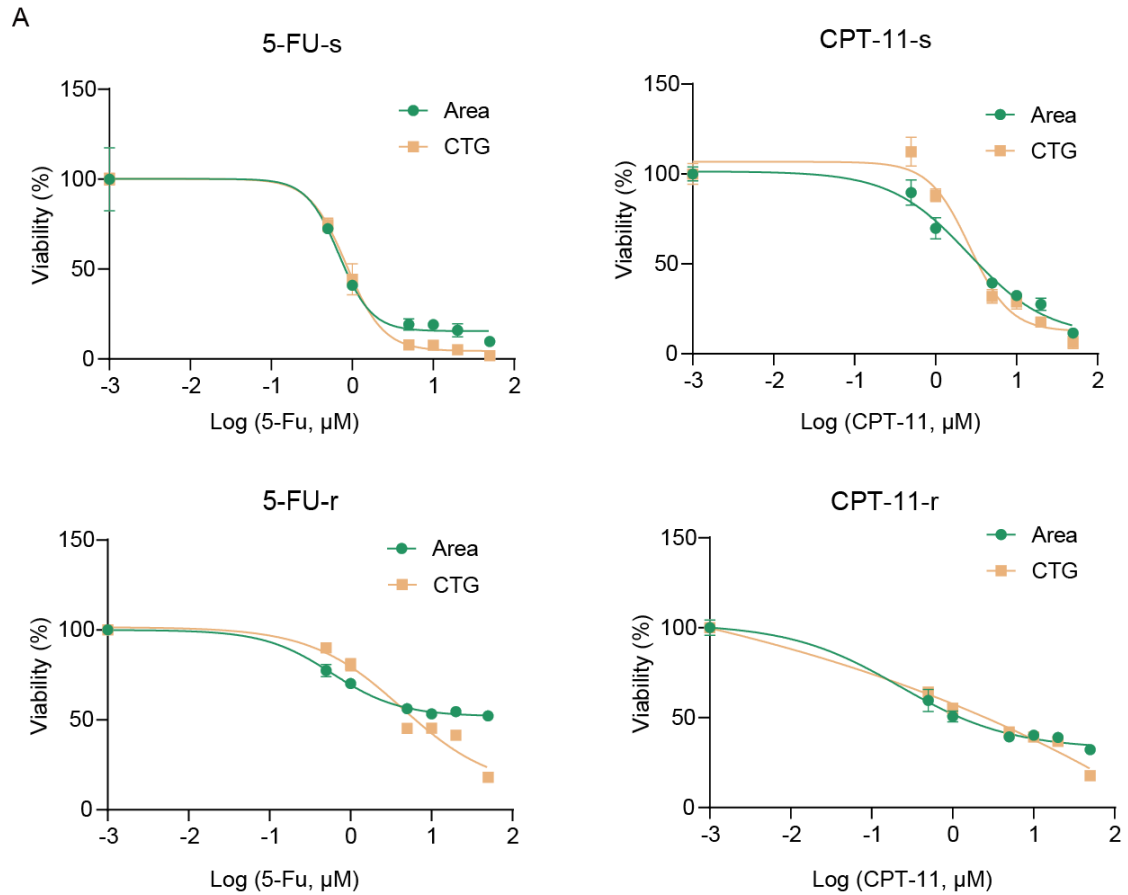

**Additional file 1: Fig. S4**

**Comparing CTG method and fluorescence labeling method to test the chemosensitivity of tumor organoids.** Cell viability changes and organoid maximum cross-section changes of organoids treated by 5-FU or CPT11. Untreated organoids were used as the starting point for both methods. Data are presented as the mean  $\pm$  SD, n=3.
